# Supplementary material for: MiRSEA: Discovering the pathways regulated by dysfunctional MicroRNAs
Source: PubMed Central journal article supplement (PMC5342398; doi:10.18632/oncotarget.10839), 2016-07-26
Supplement: oncotarget-07-55012-s001.pdf [file oncotarget-07-55012-s001.pdf]

# MiRSEA: Discovering the pathways regulated by dysfunctional MicroRNAs

## Supplementary Materials

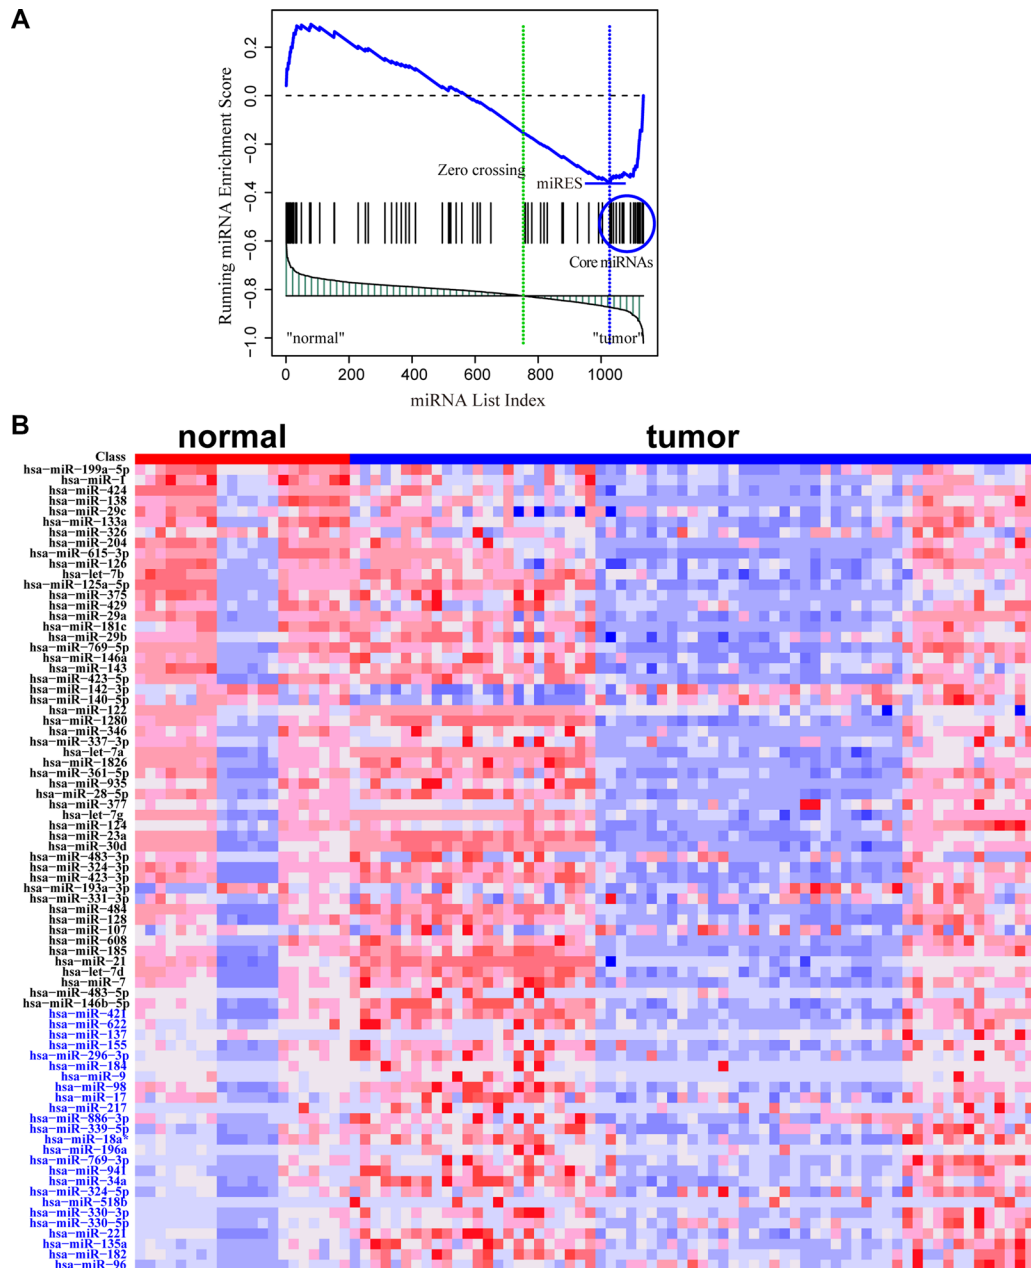

**Supplementary Figure S1: Running enrichment score of the chemokine signaling pathway.** (A) Running-sum statistic is calculated by walking down the miRNA list, and the maximum deviation from zero of the statistic is used as miRNA enrichment score (miRES) of the pathway. (B) Heatmap of the miRNAs in the pathway. Core miRNAs are marked with blue.

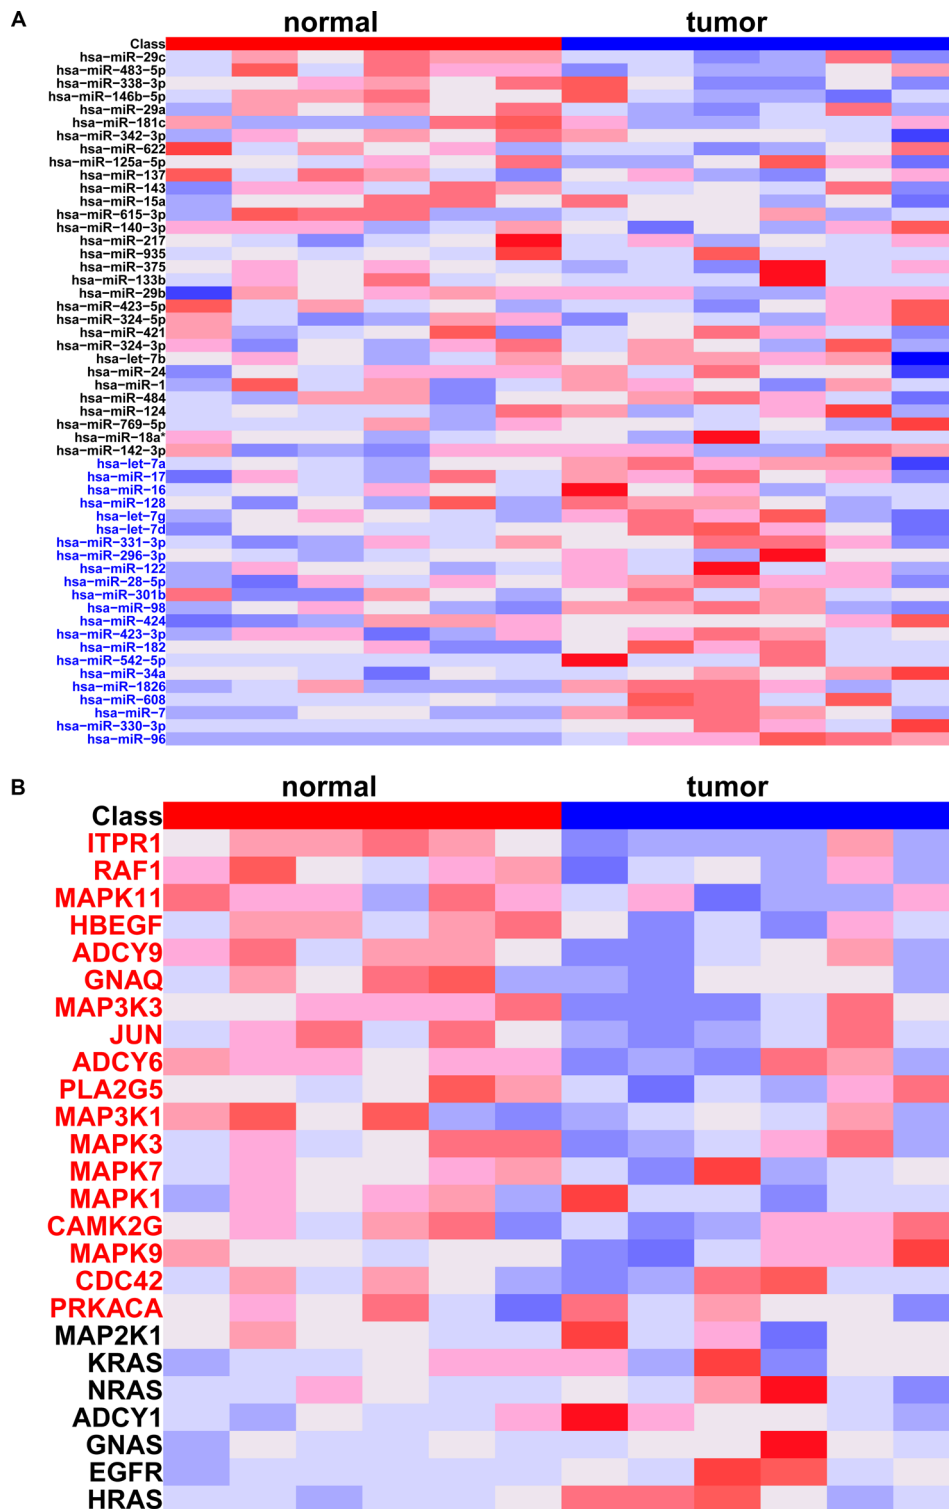

**Supplementary Figure S2:** (A) Heatmap of the miRNAs in the GnRH signaling pathway. Core miRNAs are marked with blue. (B) Heatmap of the mRNAs targeted by core miRNAs in the pathways. Down-regulated genes in the NSCLC samples are marked with red.

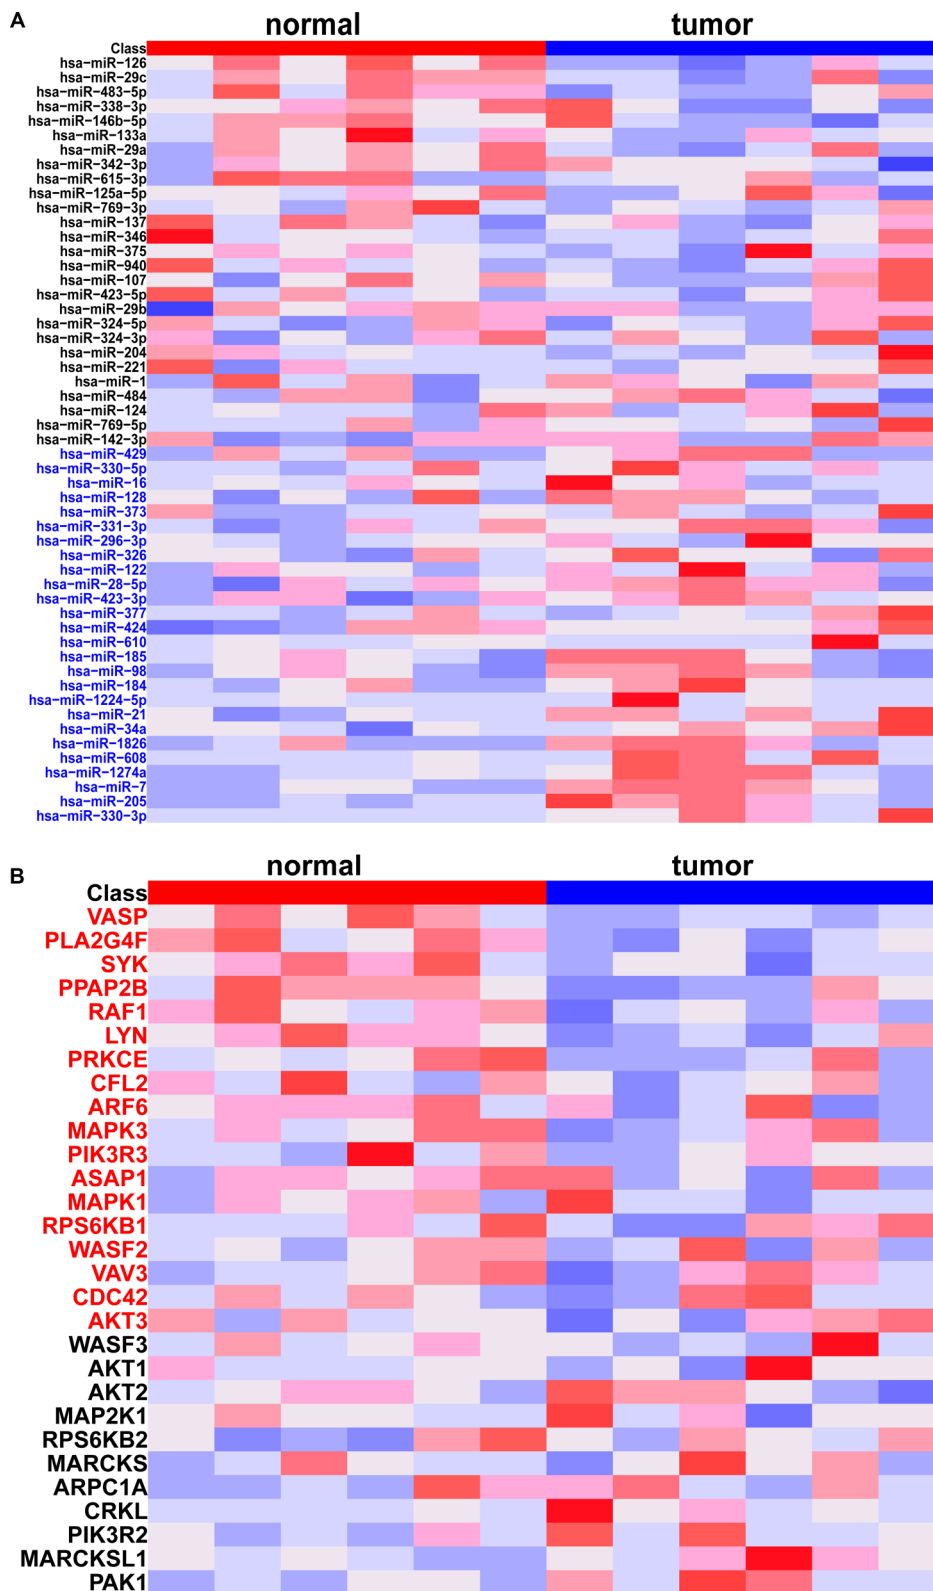

**Supplementary Figure S3:** (A) Heatmap of the miRNAs in the Fc gamma R-mediated phagocytosis pathway. Core miRNAs are marked with blue. (B) Heatmap of the mRNAs targeted by core miRNAs in the pathways. Down-regulated genes in the NSCLC samples are marked with red.

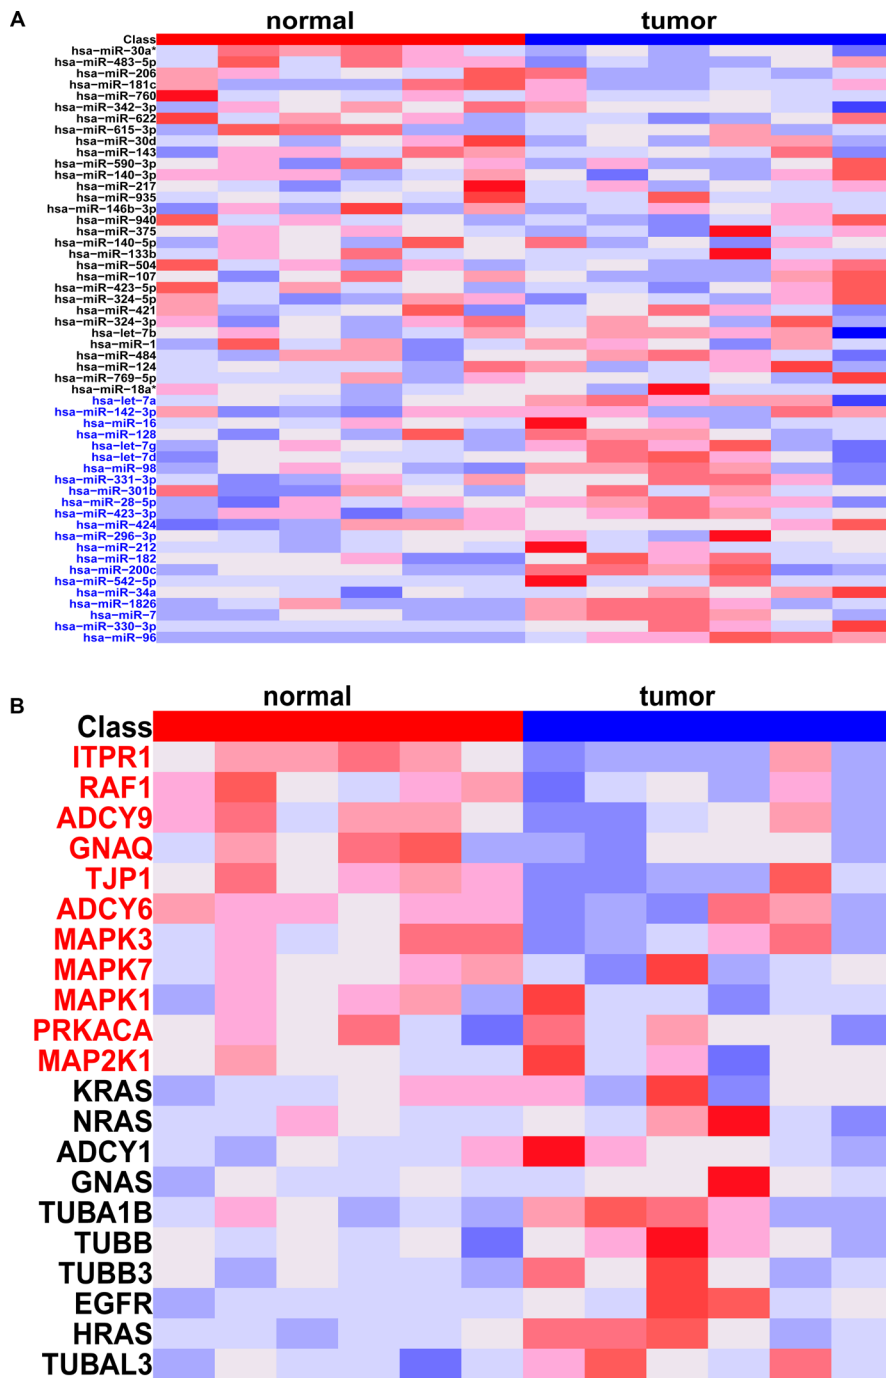

**Supplementary Figure S4:** (A) Heatmap of the miRNAs in the gap junction pathway. Core miRNAs are marked with blue. (B) Heatmap of the mRNAs targeted by core miRNAs in the pathways. Down-regulated genes in the NSCLC samples are marked with red.

**Supplementary Table S1: Full list of ranked KEGG pathways identified by MiRSEA in the human hepatocellular carcinoma (HCC) dataset.** See Supplementary\_Table\_S1.

**Supplementary Table S2: Detail information for each miRNA in the sphingolipid metabolism pathway**

| #  | miRNA          | LIST LOC | miRSCORE | RES    | CORE_ENRICHMENT |
|----|----------------|----------|----------|--------|-----------------|
| 1  | hsa-miR-1      | 4        | 0.898    | 0.223  | YES             |
| 2  | hsa-miR-125b   | 8        | 0.785    | 0.418  | YES             |
| 3  | hsa-miR-615-3p | 9        | 0.781    | 0.615  | YES             |
| 4  | hsa-miR-375    | 20       | 0.643    | 0.768  | YES             |
| 5  | hsa-miR-769-5p | 68       | 0.463    | 0.842  | YES             |
| 6  | hsa-miR-423-3p | 757      | -0.00093 | 0.23   | NO              |
| 7  | hsa-miR-331-3p | 766      | -0.0103  | 0.226  | NO              |
| 8  | hsa-miR-484    | 783      | -0.0274  | 0.219  | NO              |
| 9  | hsa-miR-128    | 818      | -0.0533  | 0.202  | NO              |
| 10 | hsa-miR-98     | 1065     | -0.312   | 0.0614 | NO              |

**Supplementary Table S3: Detail information for each miRNA in the chemokine signaling pathway.** See Supplementary\_Table\_S3.

**Supplementary Table S4: Full list of ranked KEGG pathways identified by MiRSEA in the gastric adenocarcinoma dataset.** See Supplementary\_Table\_S4.

**Supplementary Table S5: Detail information for each miRNA in the leukocyte transendothelial migration pathway**

| #  | miRNA           | LIST LOC | miRSCORE | RES     | CORE_ENRICHMENT |
|----|-----------------|----------|----------|---------|-----------------|
| 1  | hsa-miR-204     | 1        | 1.24     | 0.122   | YES             |
| 2  | hsa-miR-133a    | 2        | 0.816    | 0.202   | YES             |
| 3  | hsa-miR-193a-3p | 3        | 0.762    | 0.277   | YES             |
| 4  | hsa-miR-338-3p  | 4        | 0.676    | 0.343   | YES             |
| 5  | hsa-miR-610     | 5        | 0.65     | 0.407   | YES             |
| 6  | hsa-miR-137     | 6        | 0.534    | 0.459   | YES             |
| 7  | hsa-miR-339-5p  | 8        | 0.471    | 0.503   | YES             |
| 8  | hsa-miR-326     | 10       | 0.437    | 0.543   | YES             |
| 9  | hsa-miR-375     | 17       | 0.318    | 0.558   | YES             |
| 10 | hsa-miR-29c     | 20       | 0.298    | 0.582   | YES             |
| 11 | hsa-miR-142-3p  | 22       | 0.274    | 0.606   | YES             |
| 12 | hsa-miR-1280    | 23       | 0.265    | 0.632   | YES             |
| 13 | hsa-miR-886-3p  | 25       | 0.248    | 0.654   | YES             |
| 14 | hsa-miR-29b     | 42       | 0.162    | 0.626   | NO              |
| 15 | hsa-miR-423-5p  | 71       | 0.122    | 0.562   | NO              |
| 16 | hsa-miR-1       | 73       | 0.12     | 0.571   | NO              |
| 17 | hsa-miR-138     | 86       | 0.108    | 0.548   | NO              |
| 18 | hsa-miR-532-3p  | 102      | 0.0894   | 0.516   | NO              |
| 19 | hsa-miR-769-5p  | 122      | 0.0675   | 0.471   | NO              |
| 20 | hsa-miR-126     | 123      | 0.0631   | 0.477   | NO              |
| 21 | hsa-miR-146a    | 125      | 0.0627   | 0.481   | NO              |
| 22 | hsa-miR-331-3p  | 143      | 0.0456   | 0.439   | NO              |
| 23 | hsa-miR-324-5p  | 162      | 0.0272   | 0.392   | NO              |
| 24 | hsa-miR-29a     | 167      | 0.0214   | 0.383   | NO              |
| 25 | hsa-miR-615-3p  | 181      | 0.0135   | 0.349   | NO              |
| 26 | hsa-miR-30d     | 186      | 0.012    | 0.339   | NO              |
| 27 | hsa-miR-484     | 206      | -0.00507 | 0.288   | NO              |
| 28 | hsa-miR-24      | 216      | -0.0113  | 0.264   | NO              |
| 29 | hsa-miR-221     | 235      | -0.0217  | 0.217   | NO              |
| 30 | hsa-miR-324-3p  | 248      | -0.0306  | 0.188   | NO              |
| 31 | hsa-miR-342-3p  | 266      | -0.0447  | 0.146   | NO              |
| 32 | hsa-miR-361-5p  | 309      | -0.0893  | 0.0396  | NO              |
| 33 | hsa-miR-23a     | 327      | -0.12    | 0.00494 | NO              |
| 34 | hsa-miR-455-3p  | 356      | -0.166   | -0.0553 | NO              |
| 35 | hsa-miR-128     | 357      | -0.168   | -0.0388 | NO              |
| 36 | hsa-miR-146b-5p | 361      | -0.18    | -0.0293 | NO              |
| 37 | hsa-miR-155     | 388      | -0.306   | -0.0703 | NO              |
| 38 | hsa-miR-183     | 389      | -0.307   | -0.0401 | NO              |
| 39 | hsa-miR-1826    | 396      | -0.359   | -0.0212 | NO              |
| 40 | hsa-miR-98      | 403      | -0.466   | 0.0082  | NO              |

**Supplementary Table S6: Detail information for each miRNA in the focal adhesion pathway.**

See Supplementary\_Table\_S6.

**Supplementary Table S7: Number of significant pathway identified by MiRSEA, Traditional method and Godard et al. method in human hepatocellular carcinoma, gastric adenocarcinoma, oral carcinoma, acute lymphoblastic leukemia and lung cancer datasets**

| Method<br>Dataset              | MiRSEA |      | Traditional method |      | Godard et al. method |      |
|--------------------------------|--------|------|--------------------|------|----------------------|------|
|                                | Up     | Down | Up                 | Down | Up                   | Down |
| Human hepatocellular carcinoma | 11     | 22   | 27                 | 33   | 0                    | 0    |
| Gastric adenocarcinoma         | 0      | 15   | 29                 | 41   | 0                    | 48   |
| Oral carcinoma                 | 16     | 1    | 65                 | 59   | 49                   | 0    |
| Acute lymphoblastic leukemia   | 35     | 12   | 8                  | 1    | 0                    | 0    |
| Lung cancer                    | 61     | 0    | 56                 | 31   | 46                   | 0    |

**Supplementary Table S8: Pathways identified by three methods (MiRSEA, Traditional method, Godard et al. method) with FDR < 0.01 in the prostate cancer dataset. See Supplementary\_Table\_S8.**
